# Supplementary material for: Understanding spatiotemporal mechanical behavior, viscoelasticity, and functions of stem cell-derived cardiomyocytes
Source: Royal Society of Chemistry journal article supplement (doi:10.1039/d3nr01553j), 2023-01-01
Supplement: d3nr01553j1.pdf [file d3nr01553j1.pdf]

## Supporting Information

*Of*

### **Understanding Spatiotemporal Mechanical Behavior, Viscoelasticity, and Functions of Stem Cell-Derived Cardiomyocytes**

Lihua Lou <sup>a</sup>, Alberto Sesena Rubfiaro <sup>b</sup>, Jin He <sup>b</sup>, Arvind Agarwal <sup>a\*</sup>

<sup>a</sup> Mechanical and Materials Engineering, College of Engineering and Computing, Florida International University, 10555 West Flagler Street, Miami, FL 33174, USA

<sup>b</sup> Department of Physics, Florida International University, Miami, FL 33174, USA

\* Corresponding author.

*Corresponding author at* Mechanical and Materials Engineering, School of Biomedical, Materials and Mechanical Engineering (SBMME), College of Engineering and Computing, Florida International University Miami, FL 33174, USA.

*E-mail addresses:* [agarwala@fiu.edu](mailto:agarwala@fiu.edu) (A. Agarwal).

$E'$  It is calculated based on **Equation S1**:

$$\frac{1}{E'} = \frac{(1 - \mu_{tip}^2)}{E_{tip}} + \frac{(1 - \mu_{hiPSC-CM}^2)}{E_{hiPSC-CM}} \quad (\text{Equation S1})$$

where  $\mu_{tip}$  and  $\mu_{hiPSC-CM}$  are the Poisson's ratios of the probe (silicon, 0.28) and hiPSC-CM (0.45).

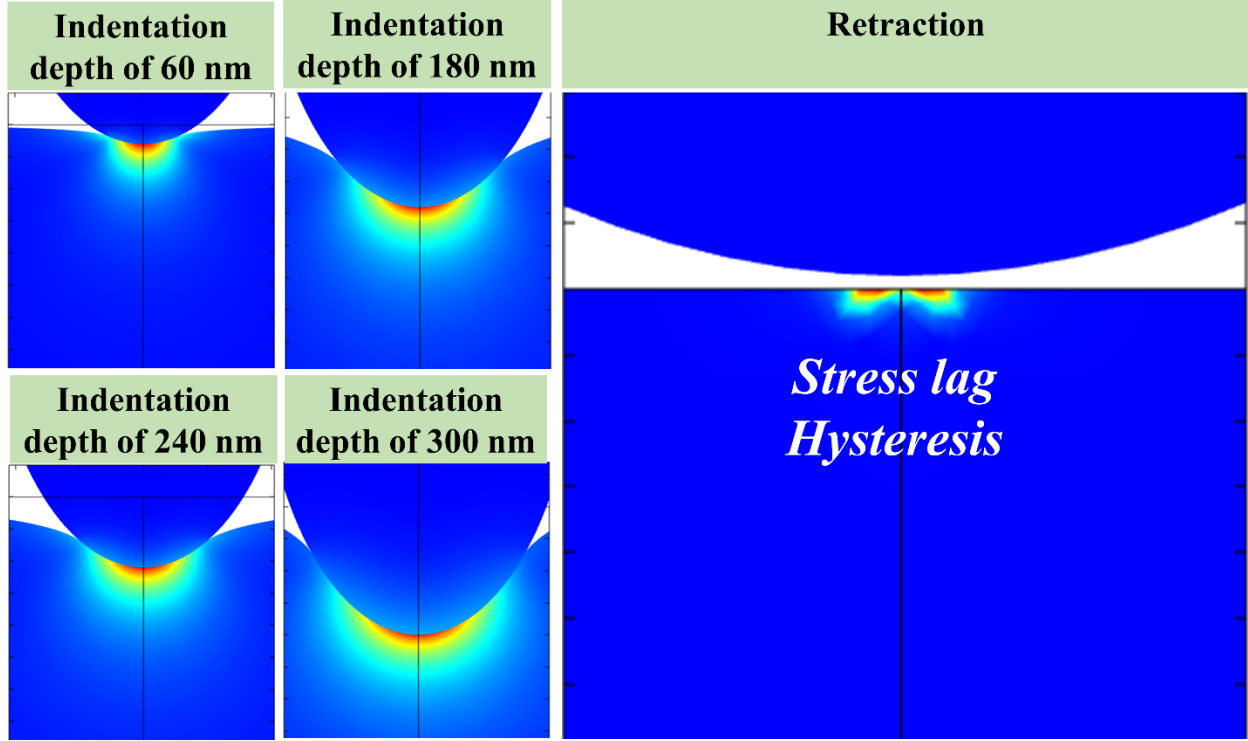

**Figure S1. Qualitative COMSOL modeling of AFM nanoindentation on the hiPSC-CM surface and load distribution.** Blue and green/yellow/red represent without and with stresses.

$$F(t) = \frac{4}{3(1 - \mu_{hiPSC-CM}^2)} \sqrt{Rd^{\frac{3}{2}}(t)E_0[g_\infty + g_1RCF_1 + g_2RCF_2 + g_3RCF_3]} \quad (\text{Equation S2})$$

where  $g_\infty$  is the normalized equilibrium modulus,  $g_i$  ( $i$  is 1, 2, or 3) is sample-related constant, and

$RCF_i$  is the ramp correlation factor,  $RCF_i = \frac{\tau_i}{t_i}(e^{\tau_i/t_i} - 1)$ , where  $\tau_i$  is the finite ramp time.

$$s_c = 1 - \frac{\min^{[ro]}(L_x, L_y)}{\max^{[ro]}(L_x, L_y)} \quad (\text{Equation S3})$$

where  $L_x$  and  $L_y$  are the x-directional and y-directional lengths of a cell.

$$\varepsilon(t) = \frac{\sigma_0}{E}(1 - \exp(- (E/\eta)t)) \quad \text{(Equation S4)}$$

where  $\sigma_0$ ,  $E$ , and  $\eta$  are the stress, elastic modulus, and viscosity of the materials.
